# Supplementary material
Source: HighWire-hosted journal article supplement (https://cmajopen.ca/highwire/filestream/84925/field_highwire_adjunct_files/11/2020-0323-9-at.pdf)

**Appendix 9. Distribution of length of stay for patients hospitalized in the ward for all individuals between March 1 and September 30, 2020**

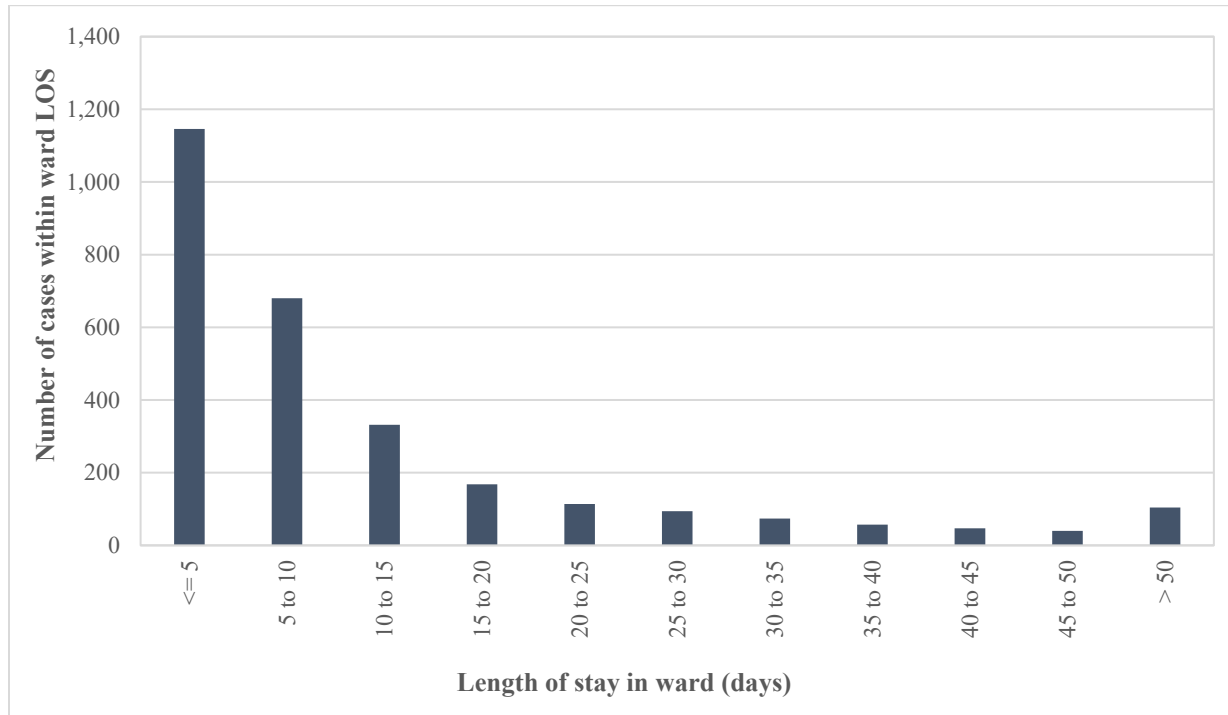

Supplement: 2020-0323-9-at.pdf [file 2020-0323-9-at.pdf]
